# Supplementary material for: Resource requirements, behaviour, and weather constraints on activity of the butterfly Aporia crataegi in Normandy, France
Source: Research Square preprint supplement (doi:10.21203/rs.3.rs-7235022/v1), 2025-09-04
Supplement: Supplementary file 1 [file 836a716ace90e46f1e1d4403.docx]

## **SUPPORTING INFORMATION**

**Resource requirements, behaviour, and weather constraints on activity of the butterfly *Aporia crataegi* in Normandy, France**

Hanhee Woo1*, Arathi Nirmala Kumari1*, Simon Roper2, Fraser Rush2, Emily Pediatiti3, Kathy Hodder4, Tim Shreeve3, Tom Brereton5, Fabrizia Ratto1**†**

Corresponding author email: [Fabrizia.ratto@rhul.ac.uk](mailto:Fabrizia.ratto@rhul.ac.uk)

**Table S1. Relationship between *A. crataegi* Population Size and Habitat Descriptors from Linear Models.**

| Habitat Component | Predictor | Coefficient  (β ± SE) | *z* | *P* |
| --- | --- | --- | --- | --- |
| Resource  Composition  and  Availability | Intercept | 1.9205  (± 0.2046) *** | 9.385 | < .001 |
|  | Host Plant  Proportion | -0.4177  (± 0.1614) ** | -2.589 | .0096 |
|  | Nectar Plant Proportion | 1.3368  (± 0.2262) *** | 5.910 | < .001 |
|  | Species Richness | -0.4355  (± 0.3966) | -1.098 | .272 |
| Resource Configuration | Intercept | -0.6969  (± 0.7618) | -0.915 | .360 |
|  | Distribution  (Host Plant) | 2.9690  (± 0.7413) *** | 4.005 | < .001 |
|  | Distribution  (Nectar Plant) | -6.7923  (± 1.5405) *** | -4.409 | < .001 |
|  | Organisation | 1.7951  (± 0.7551) * | 2.377 | .017 |

**p* < .05, ***p* < .01, ****p* < .001.

**Table S2. Model Selection Result with AIC, Akaike Weight and Variables under Each Model**

|  | Resource Availability and Composition Model | Resource Configuration Model |
| --- | --- | --- |
| Host Plant Percentage | x |  |
| Nectar Plant Percentage | x |  |
| Species Richness | x |  |
| Host Plant Distribution |  | x |
| Nectar Plant Distribution |  | x |
| Organisation |  | x |
| AIC | 52.58 | 40 |
| Akaike Weight | 0.002 | 0.998 |

“X” marks the included variables in the model.; AIC: Akaike Information Criterion (AIC); Akaike Weight: Calculated from AIC differences between models normalizing the relative likelihoods sum to 1


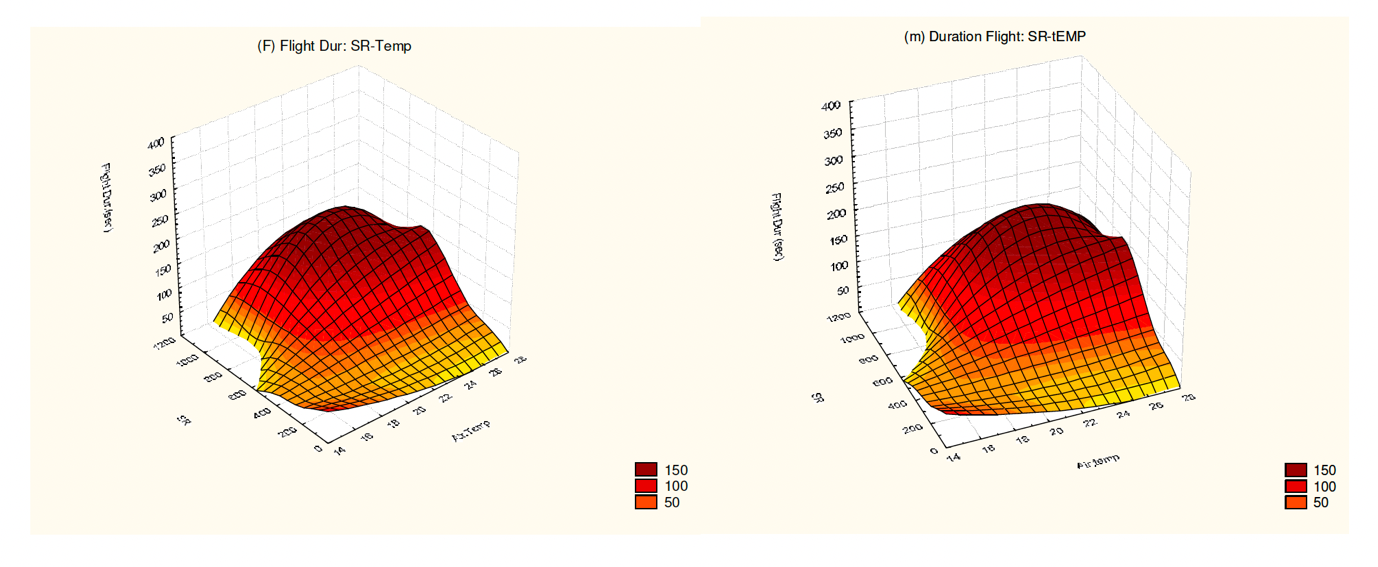


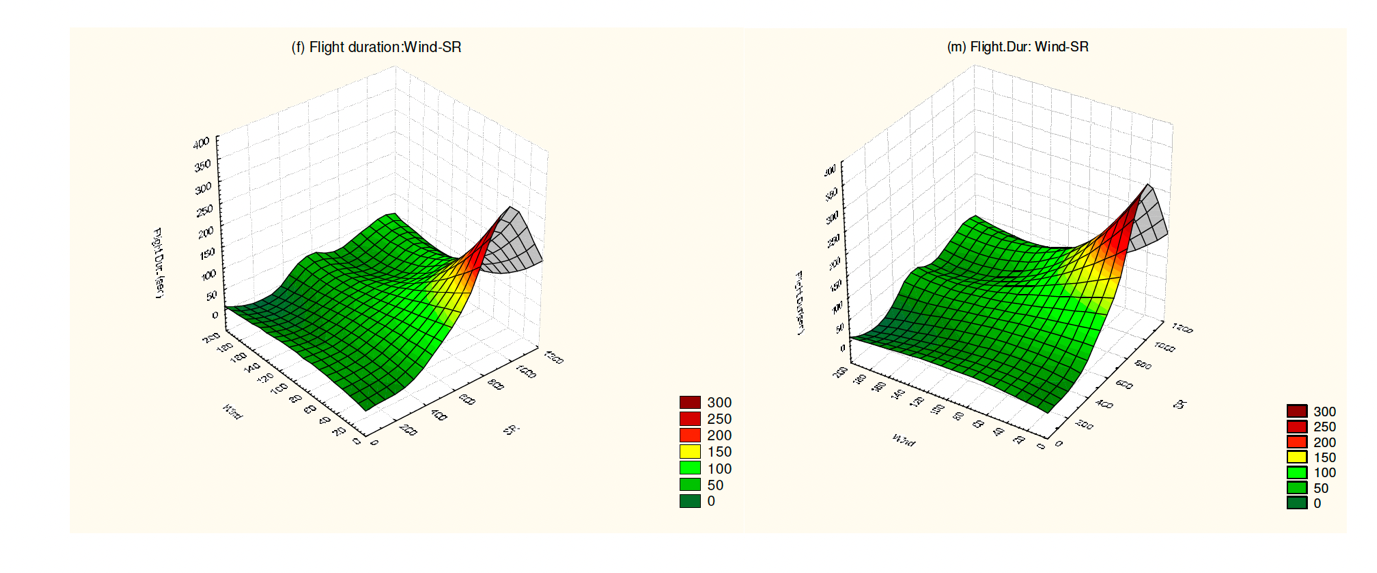


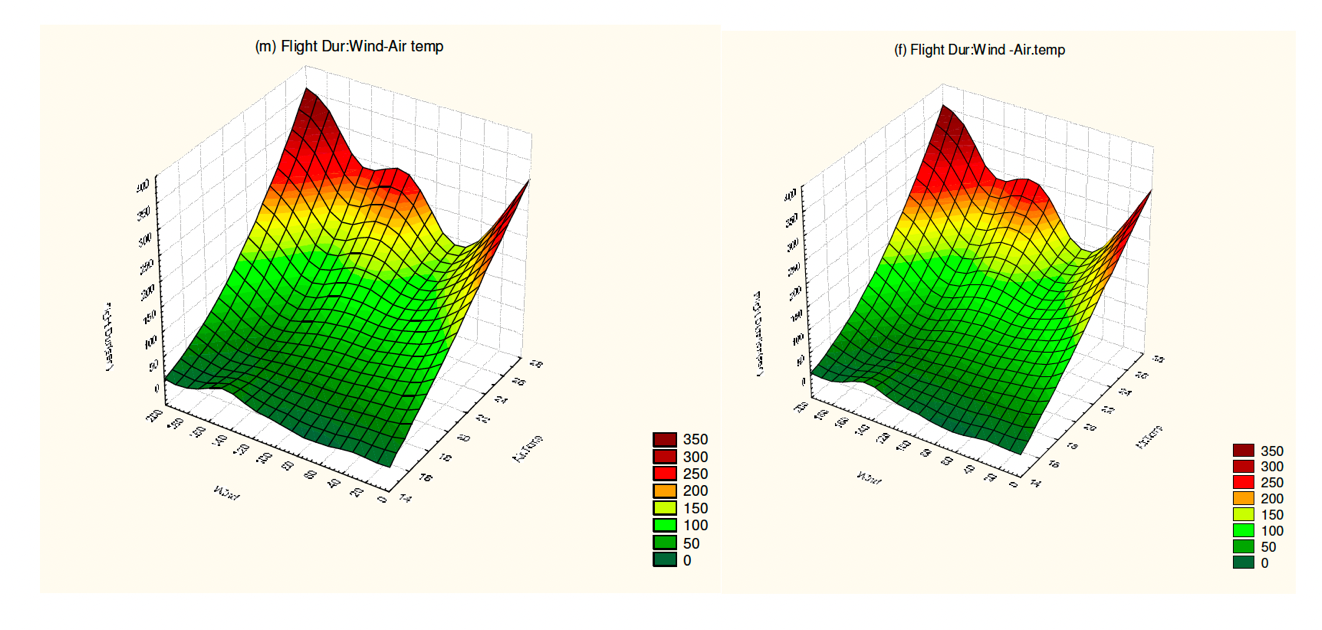


**Figure S1:** Flight duration of males (left) and females (right) in relation to (a) solar radiation intensity and air temperature; (b) solar radiation intensity and wind speed and ; (c) air temperature and wind speed.
